# Supplementary material
Source: PubMed Central journal article supplement (PMC6796878)
Supplement: 41422_2019_187_MOESM1_ESM.pdf [file 41422_2019_187_MOESM1_ESM.pdf]

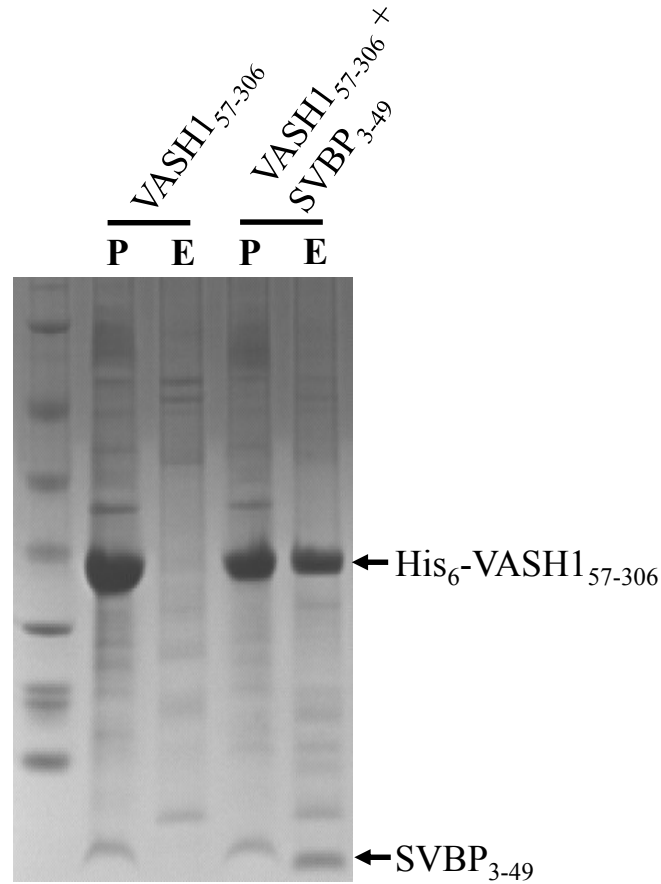

**Figure S1. SVBP<sub>3-49</sub> stabilizes recombinant VASH1<sup>57-306</sup>.** SDS-page gel indicates that the majority of recombinant His<sub>6</sub>-VASH1<sub>57-306</sub> alone expressed as inclusion body, whereas co-expression of His<sub>6</sub>-VASH1<sub>57-306</sub> and SVBP<sub>3-49</sub> greatly enhanced the solubility of VASH1. P: Pellet; E: Elution from Ni-NTA resin.
