# Supplementary material
Source: PubMed Central journal article supplement (PMC6796878)
Supplement: 41422_2019_187_MOESM3_ESM.pdf [file 41422_2019_187_MOESM3_ESM.pdf]

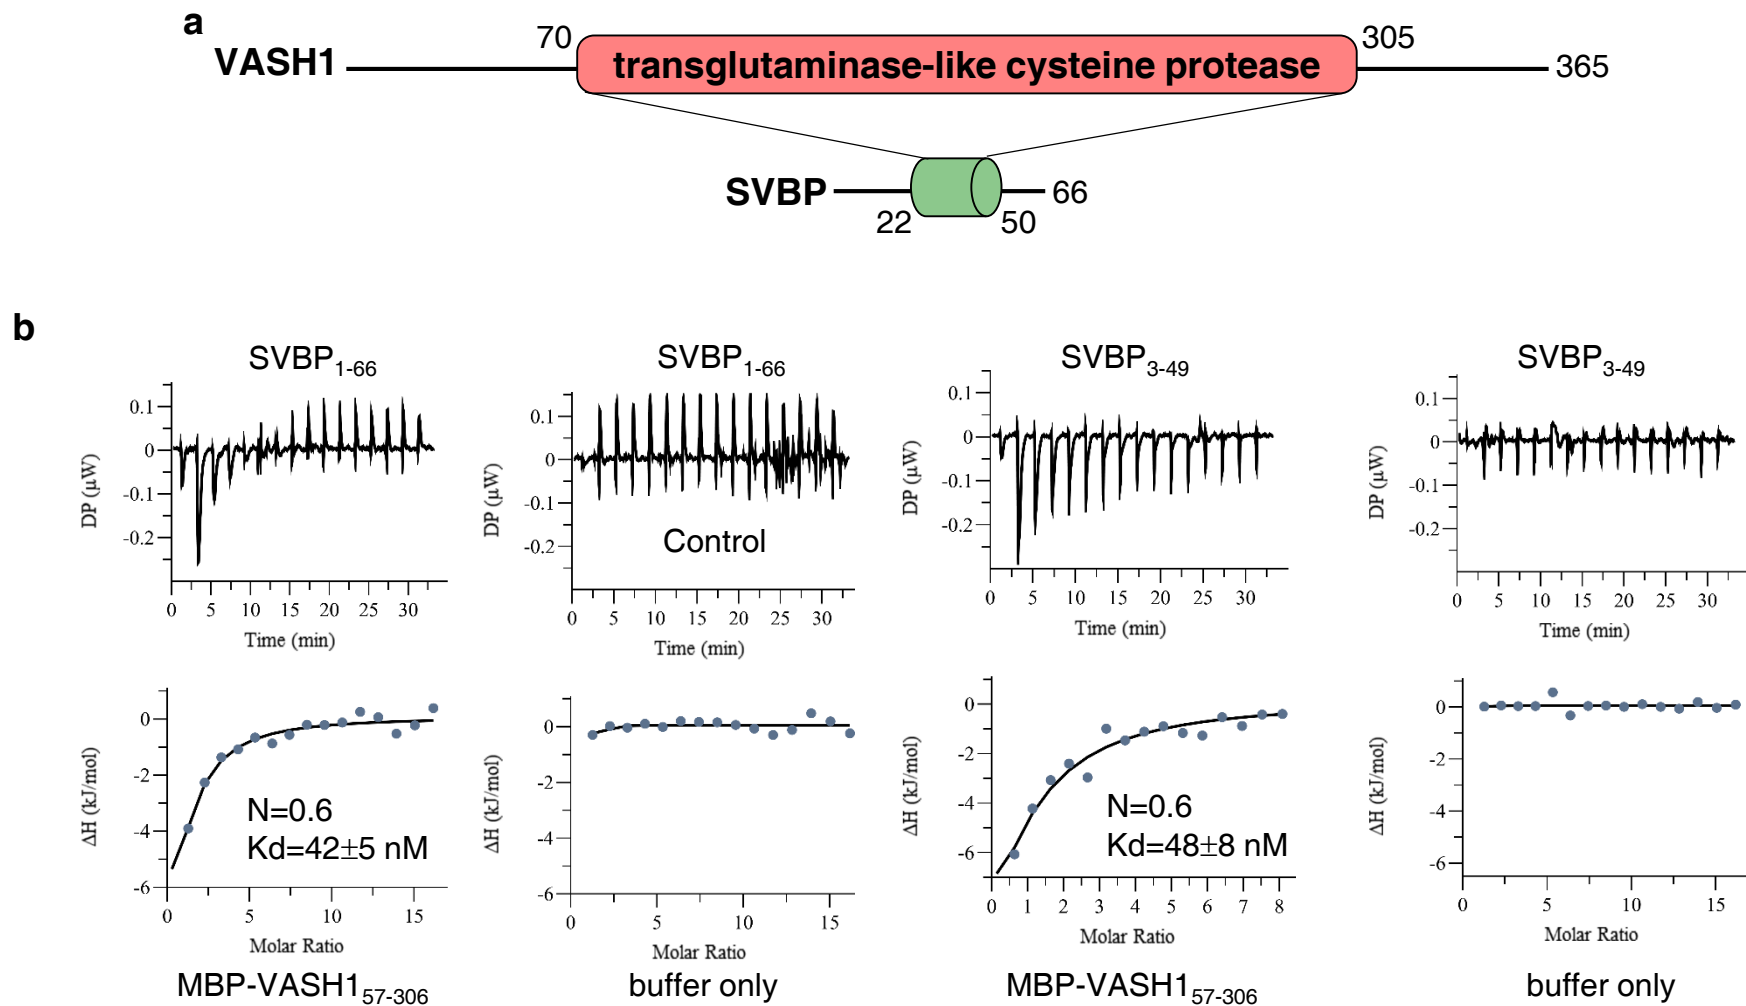

**Figure S3. The heterodimer formed by SVBP and VASH1.** **a** Domain architecture of full-length human VASH1 (aa 1-365) and SVBP (aa 1-66). **b** ITC binding curves for the binding of MBP-VASH1(57-306) to SVBP (1-66) and SVBP(3-49), respectively.
