# Supplementary material
Source: PubMed Central journal article supplement (PMC6796878)
Supplement: 41422_2019_187_MOESM4_ESM.pdf [file 41422_2019_187_MOESM4_ESM.pdf]

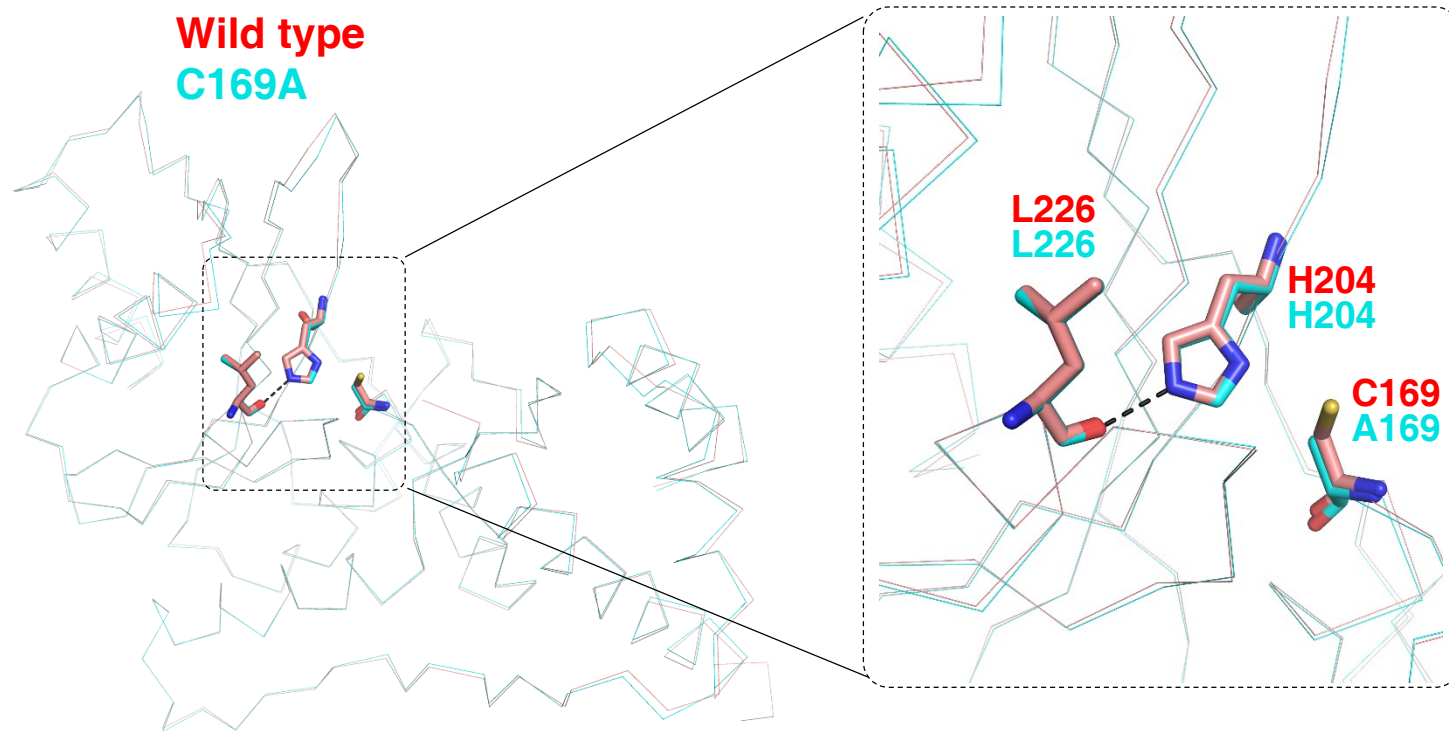

**Figure S4. Superposition of structures of wild type VASH1 (red ribbon) and VASH1 C169A (cyan ribbon), with the catalytic-triad residues shown in sticks.**
