# Supplementary material
Source: PubMed Central journal article supplement (PMC6796878)
Supplement: 41422_2019_187_MOESM5_ESM.pdf [file 41422_2019_187_MOESM5_ESM.pdf]

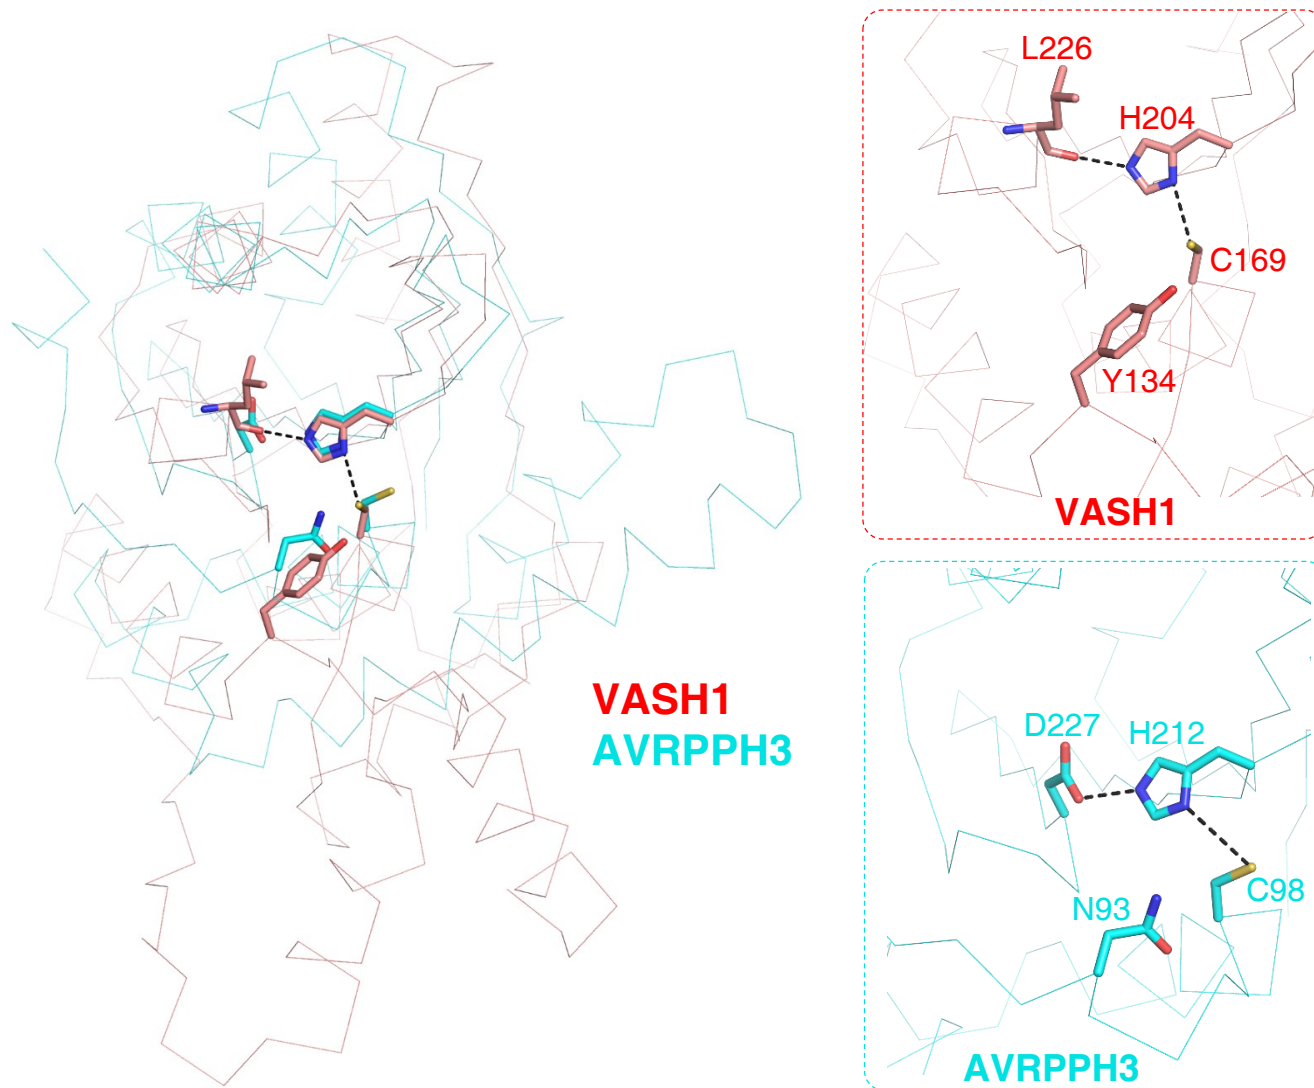

**Figure S5. Structural alignment of VASH1 (red ribbon) and AVRPPH3 (cyan, pdb id: 1UKF), with catalytic-triad residues of both proteins shown in sticks. Tyr134 of VASH1, as well as Asn93 of AVRPPH3 are shown in sticks.**
