# Supplementary material
Source: PubMed Central journal article supplement (PMC6796878)
Supplement: 41422_2019_187_MOESM7_ESM.pdf [file 41422_2019_187_MOESM7_ESM.pdf]

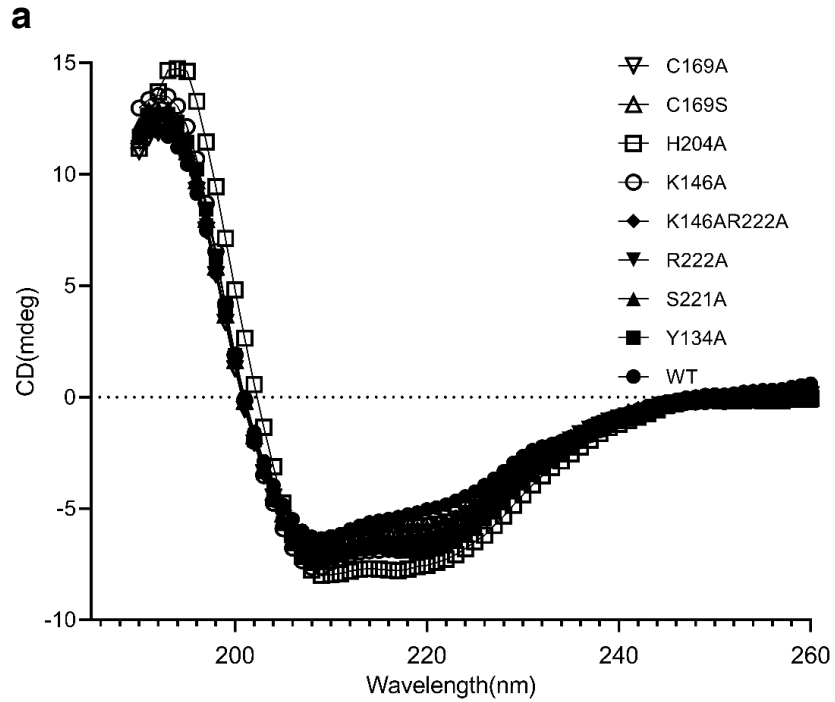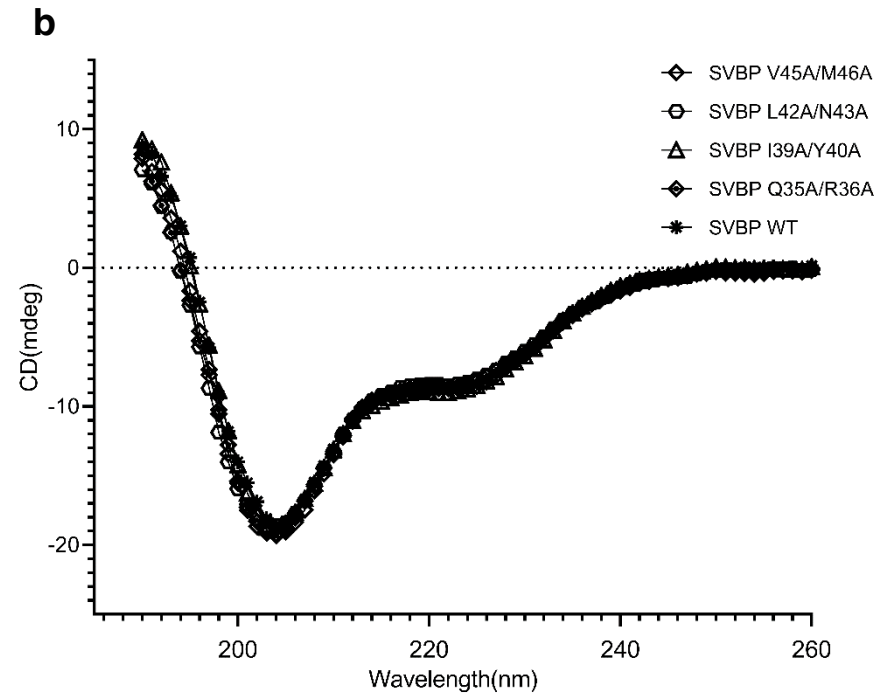

**Figure S7. a** Circular dichroism (CD) spectrum of wild type VASH1 ( ) and its mutants. **b** Circular dichroism (CD) spectrum of wild type SVBP (1-66) and its mutants.
