# Supplementary material
Source: PubMed Central journal article supplement (PMC6796878)
Supplement: 41422_2019_187_MOESM9_ESM.pdf [file 41422_2019_187_MOESM9_ESM.pdf]

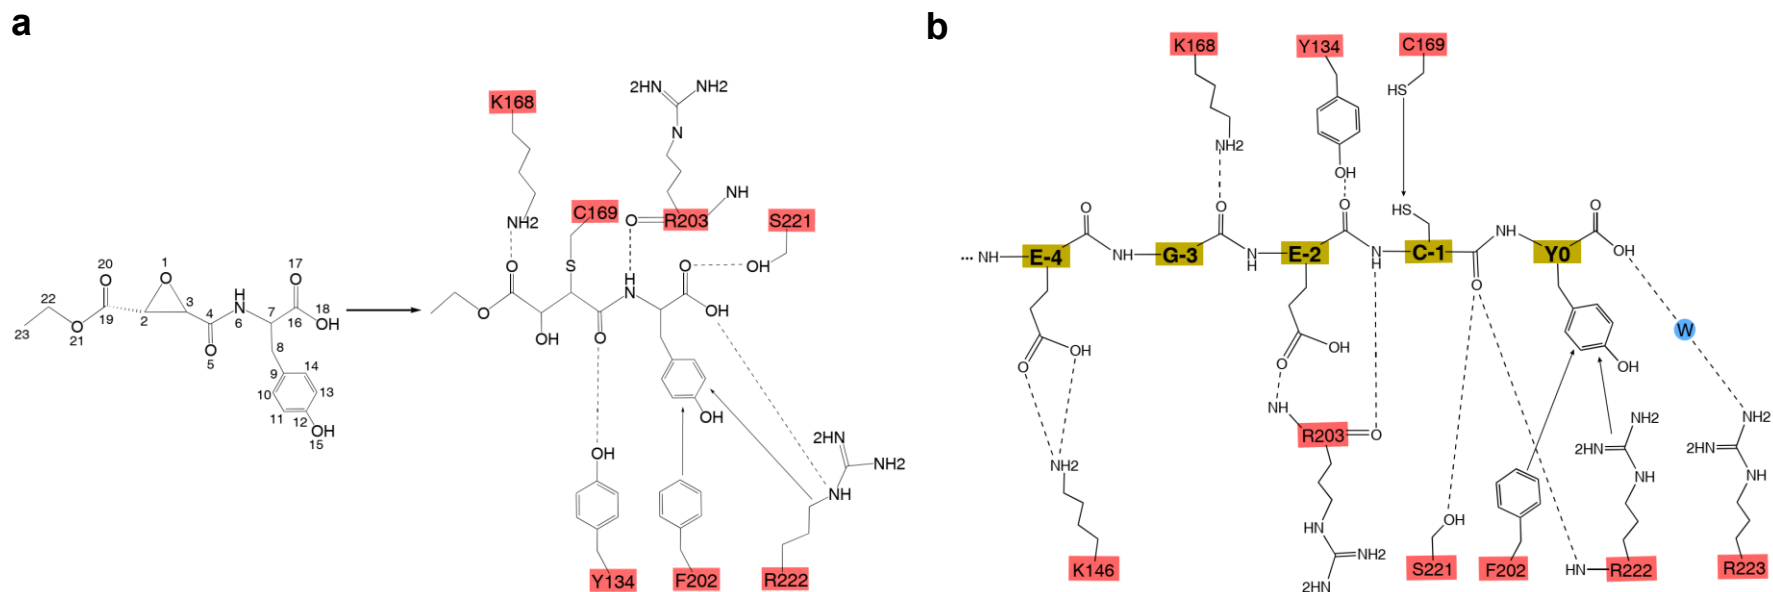

**Figure S9. Schematic of the detailed interactions between a VASH1 and epoY and b VASH1 and <sup>-4</sup>EGECY<sup>0</sup> of the peptide, to show how VASH1 recognizes the inhibitor and the substrate, respectively. VASH1 residues, peptide residues and water molecule, are colored in red, yellow, and blue, respectively. Intermolecular hydrogen bonds and hydrophobic interactions are indicated by black dashes and black arrows, respectively.**
