# Supplementary material
Source: PubMed Central journal article supplement (PMC6796878)
Supplement: 41422_2019_187_MOESM10_ESM.pdf [file 41422_2019_187_MOESM10_ESM.pdf]

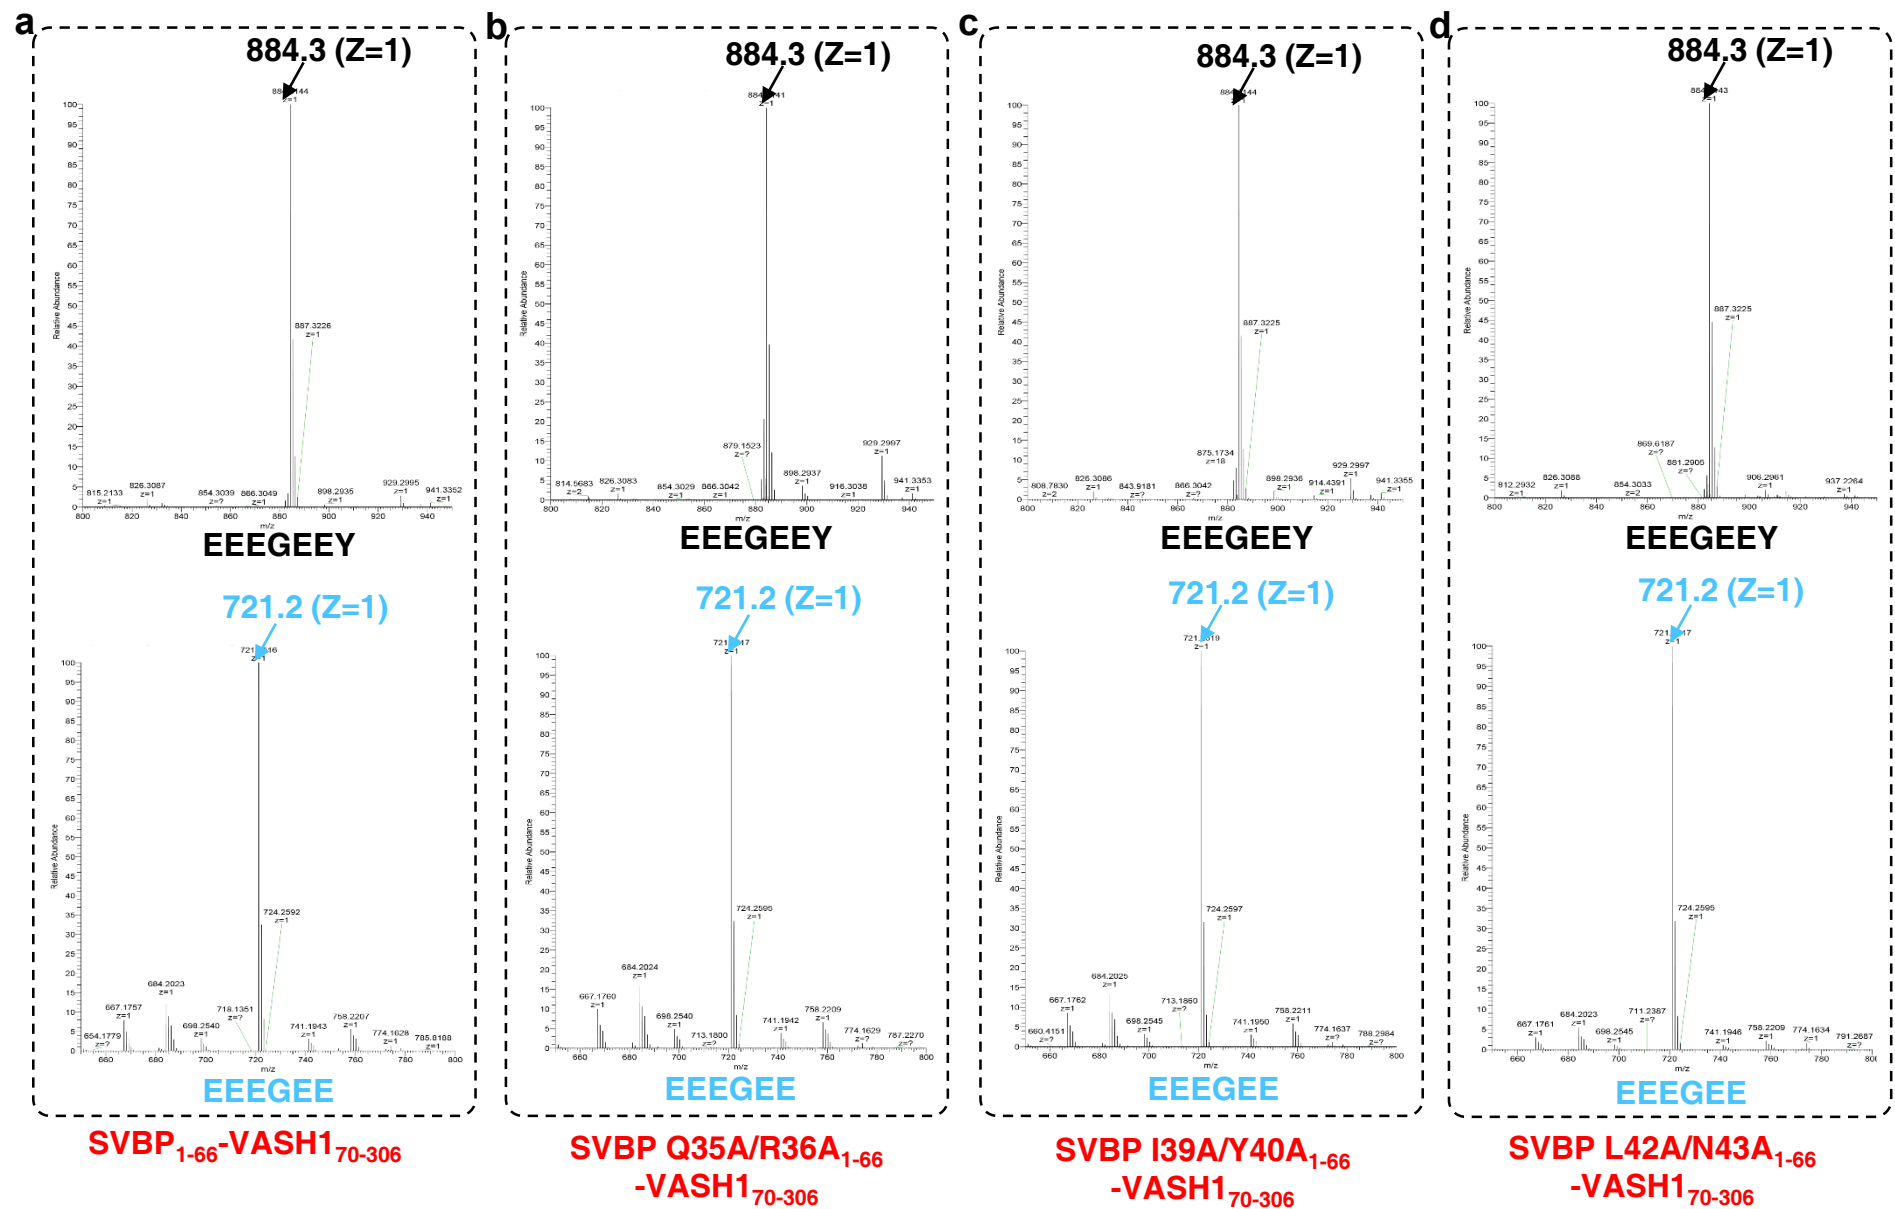

Figure S10 (To be continued)

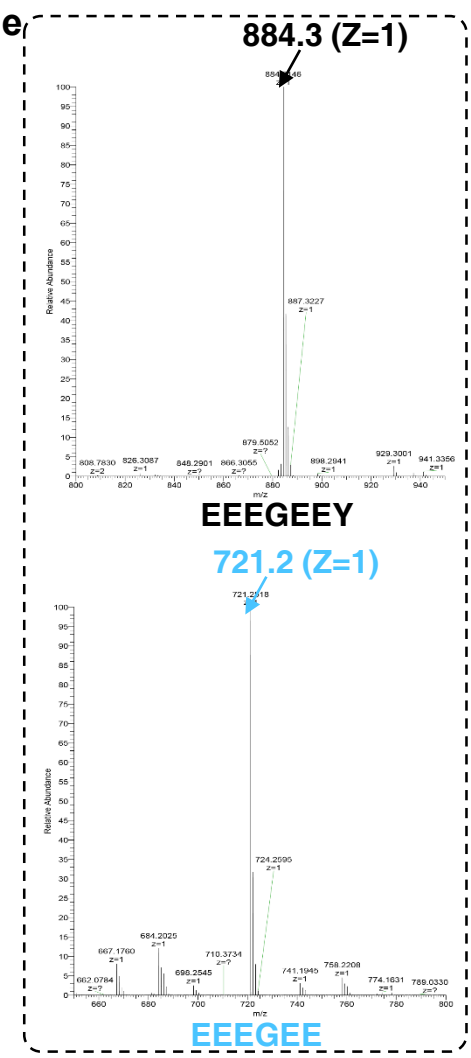

**SVBP V45A/M46A<sub>1-66</sub>-VASH1<sub>70-306</sub>**

**Figure S10. Mass spectra data of the EEGEYY peptide digested by SVBP/VASH1 and its variants. a** wild type SVBP<sub>1-66</sub>-VASH1<sub>70-306</sub>, **b** SVBP Q35A/R36A<sub>1-66</sub>-VASH1<sub>70-306</sub>, **c** SVBP I39A/Y40A<sub>1-66</sub>-VASH1<sub>70-306</sub>, **d** SVBP L42A/N43A<sub>1-66</sub>-VASH1<sub>70-306</sub>, **e** SVBP V45A/M46A<sub>1-66</sub>-VASH1<sub>70-306</sub>. Molecular weights and sequences of de tyrosinated peptide are labelled in blue. The intensities of peptides detected by the mass spectrometry are shown in Table S3.

**Figure S10**
