# Supplementary material
Source: PubMed Central journal article supplement (PMC6796878)
Supplement: 41422_2019_187_MOESM11_ESM.pdf [file 41422_2019_187_MOESM11_ESM.pdf]

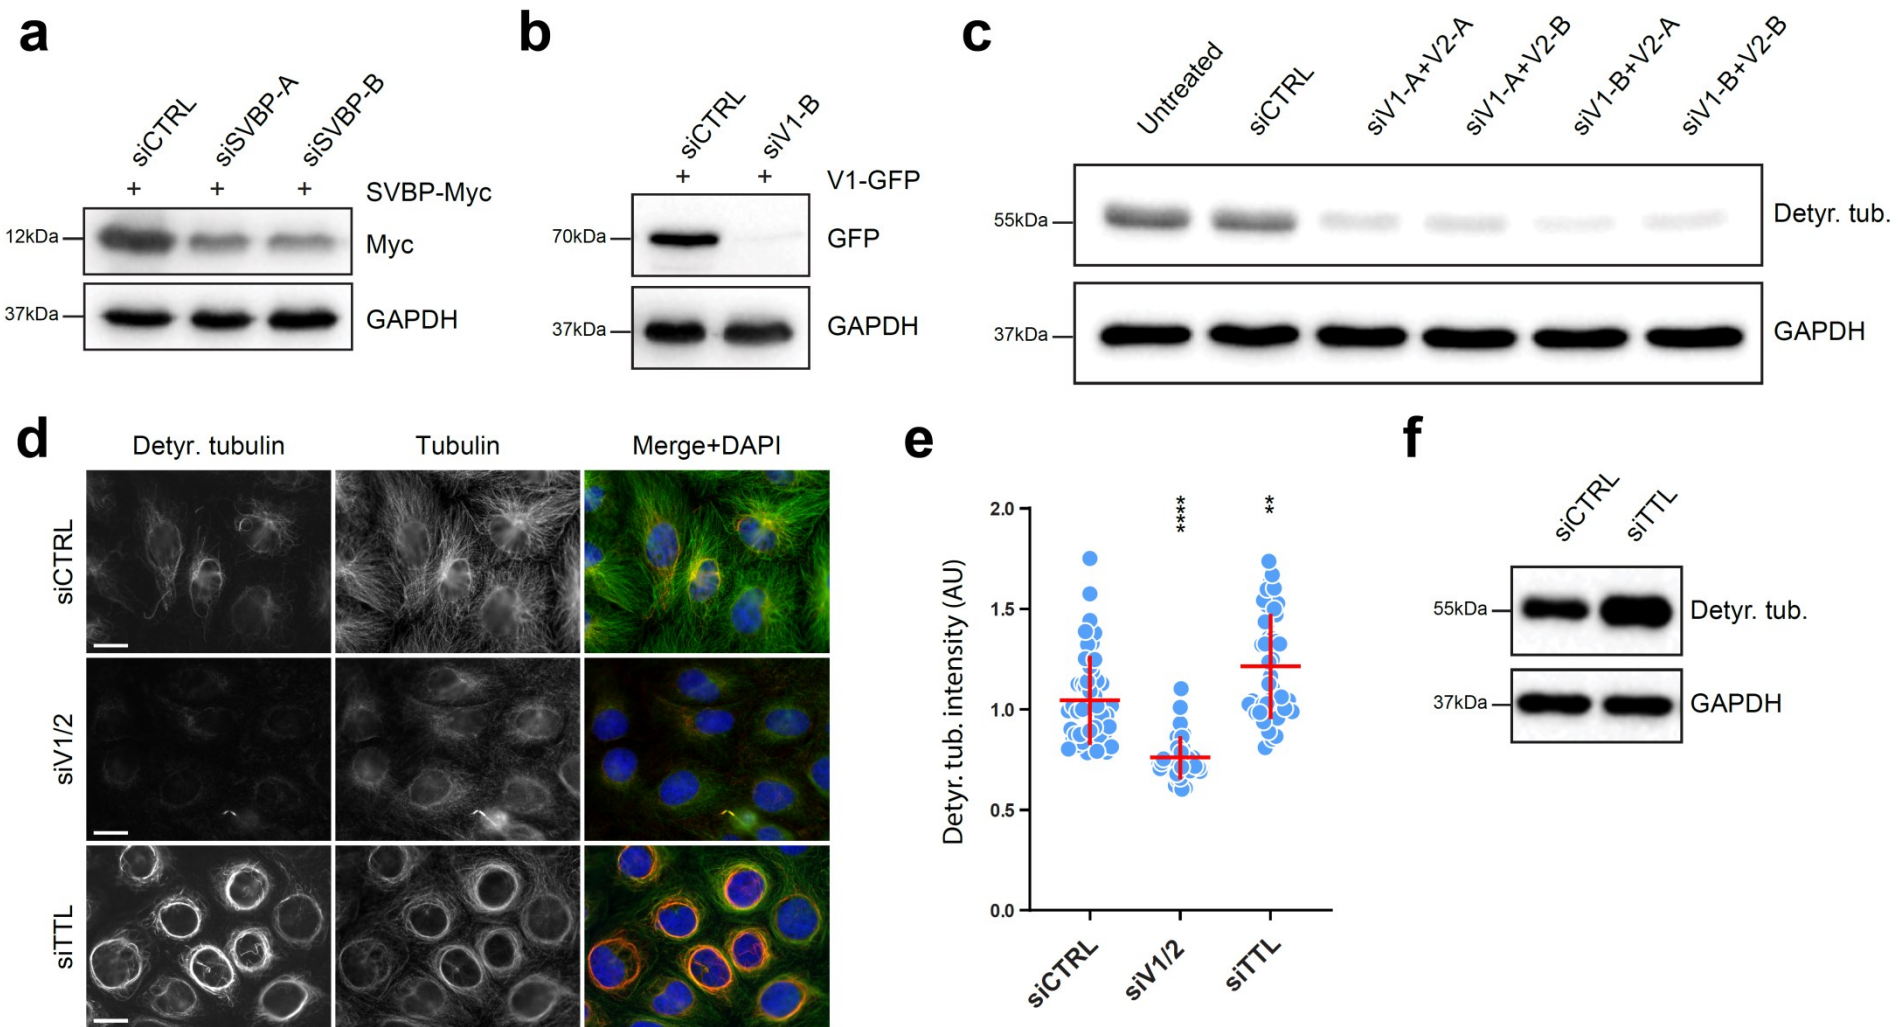

**Figure S11**

**Figure S11. Evaluation of efficiencies RNAi mediated knockdown of VASH1, VASH2 and TTL and their impact on cellular detyrosination.** **a and b** Immunoblot analysis of cells expressing SVBP-Myc or VASH1-GFP transfected with control or siRNAs specific for SVBP or VASH1. The knockdown efficiency of SVBP and VASH1 specific siRNAs were observed using anti-Myc or anti-GFP respectively with GAPDH as loading control. **c** Assessment of VASH1/2 knockdown by RNAi. Efficiency of multiple siRNA combinations assessed by immunoblot of protein lysates from cells transfected with combinations of VASH1-A&B and VASH2-A&B siRNAs and probing with detyrosinated tubulin antibody with GAPDH as loading control. **d** Representative immunofluorescence images of U2OS cells transfected with siRNAs against VASH1/2 or TTL. Detyrosinated and total  $\alpha$ -tubulin pools were detected using the respective antibodies and DNA was counterstained with DAPI. In merged image, Detyrosinated tubulin in red, total  $\alpha$ -tubulin in green, and DNA in blue. Scale bar: 20  $\mu$ m. **e** Detyrosinated tubulin levels were quantified from sum projections of the immunofluorescence images of interphase cells and normalized to respective levels of total  $\alpha$ -tubulin. N(number of cells, number of independent experiments): siCTRL (48, 2); siVASH1/2 (48, 2); siTTL (47, 2). P-values were calculated using Mann-Whitney U test. \*\*  $p < 0.01$ , \*\*\*  $p < 0.001$ . **f** Immunoblot demonstrating the effect of knockdown of TTL on  $\alpha$ -tubulin detyrosination levels with GAPDH serving as a loading control.
