# Supplementary material
Source: PubMed Central journal article supplement (PMC6796878)
Supplement: 41422_2019_187_MOESM14_ESM.pdf [file 41422_2019_187_MOESM14_ESM.pdf]

**a**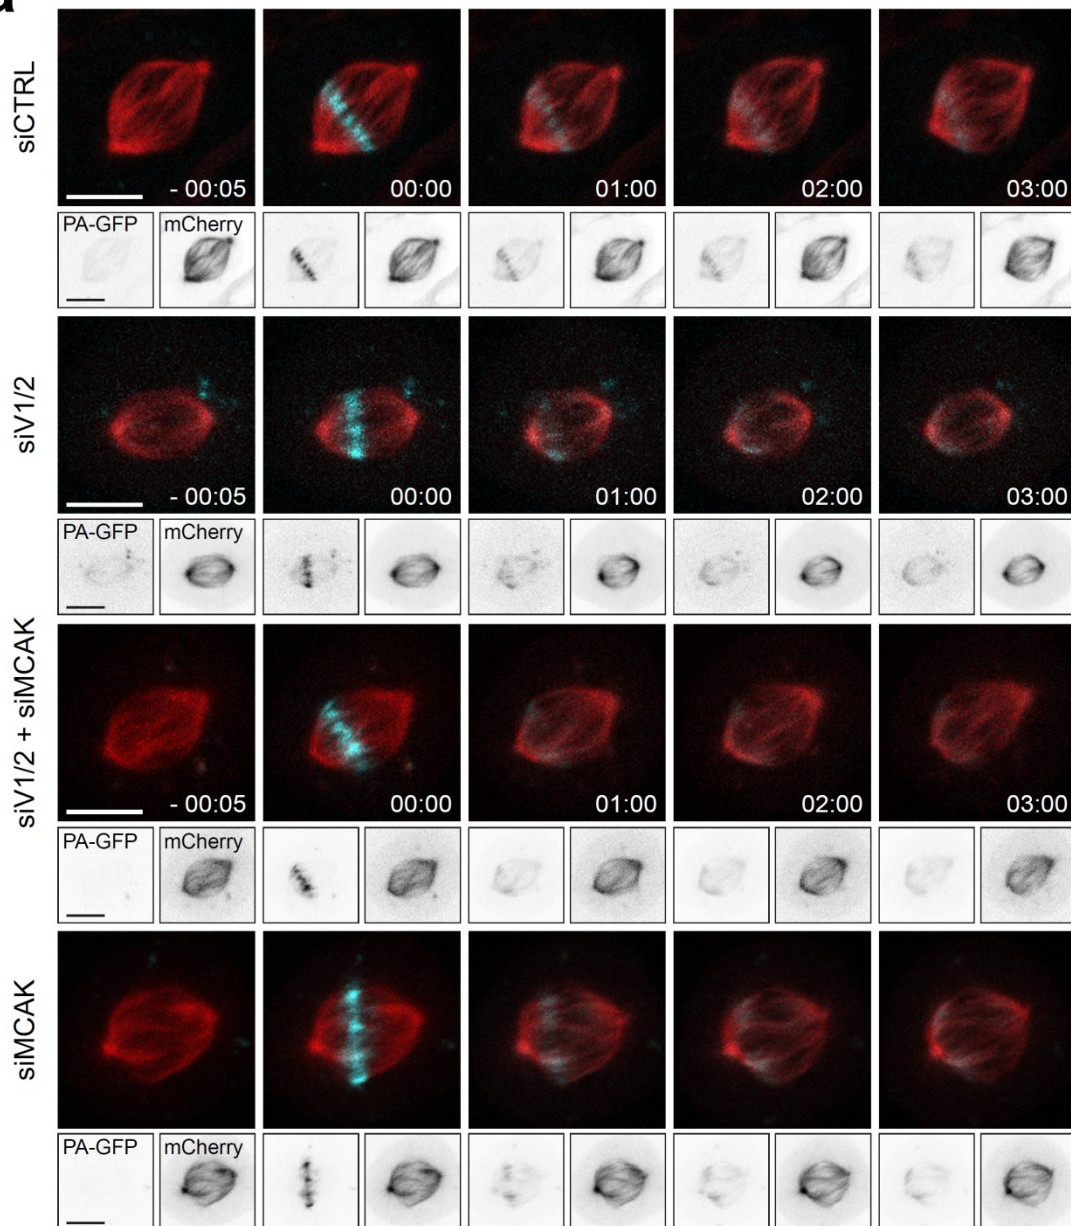**b**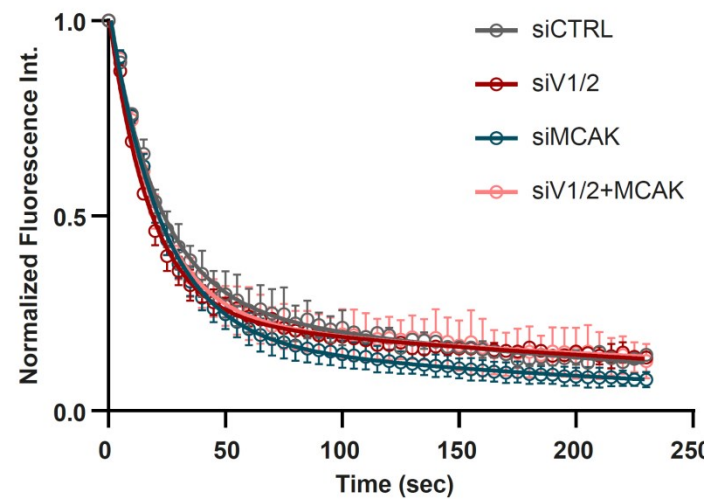**c**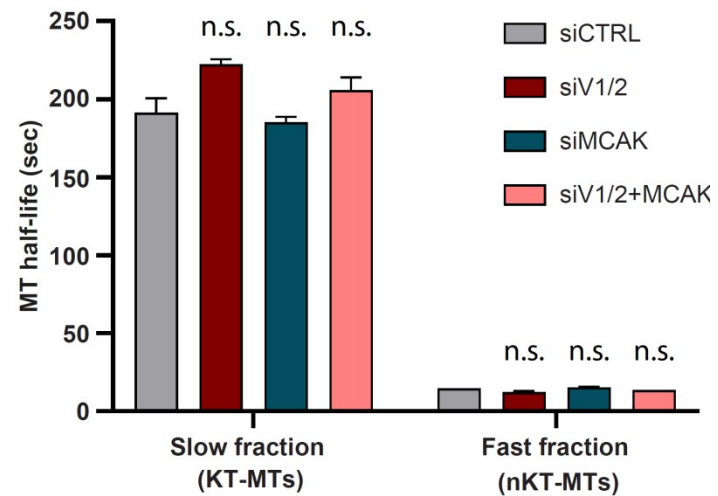**Figure S14**

**Figure S14. Influence of vasohibins and MCAK depletion on spindle microtubule turnover. a** Representative spinning-disk confocal time-series images of mitotic spindles of U2OS-PA-GFP/m-cherry  $\alpha$ -tubulin cells treated with indicated siRNAs before and after photoactivation. Microtubules of late prometaphase/metaphase spindles of U2OS expressing PA-GFP/m-cherry  $\alpha$ -tubulin were photoactivated across one half-spindle and tracked over time. Photoactivated microtubules are shown in cyan and m-cherry  $\alpha$ -tubulin in red. Bottom panels show inverted individual channels of the merged image. Scale bar: 10  $\mu$ m **b** Exponential decay of normalized, photobleaching corrected fluorescence intensity of photoactivated  $\alpha$ -tubulin over time. Data represent mean  $\pm$  SEM. **c** MT half-lives of kinetochore MTs (KT-MTs) and non-kinetochore MTs (nKT-MTs) obtained by fitting the data with a double exponential function. Mean  $\pm$  SEM are shown. N(number of cells, number of independent experiments): siCTRL (28, 2); siVASH1/2 (24, 2); siMCAK (28, 2); siVASH1/2+siMCAK (22, 2). P-values were calculated using Mann-Whitney U test. n.s. not significant.
