# Supplementary material
Source: PubMed Central journal article supplement (PMC6796878)
Supplement: 41422_2019_187_MOESM15_ESM.pdf [file 41422_2019_187_MOESM15_ESM.pdf]

## Supplementary Information

**Table S1. The activity of SVBP-VASH1 heterodimer toward peptide substrate detected by mass spectrometry**

| <b>Proteins</b>                                           | <b>Peptides</b> | <b>MS Intensity<br/>(Substrate)</b> | <b>MS Intensity<br/>(Product)</b> | <b>Percentage of detyrosination<br/>(Product/(Substrate+product))</b> |
|-----------------------------------------------------------|-----------------|-------------------------------------|-----------------------------------|-----------------------------------------------------------------------|
| No protein                                                | EEEGEEY         | 7.3x10 <sup>9</sup>                 | *ND                               | #N/A                                                                  |
| SVBP <sub>1-66</sub> -VASH1 <sub>70-306</sub>             | EEEGEEY         | 2.6x10 <sup>5</sup>                 | 1.3x10 <sup>7</sup>               | 98%                                                                   |
| SVBP <sub>3-49</sub> -VASH1 <sub>70-306</sub>             | EEEGEEY         | ND                                  | 1.5x10 <sup>7</sup>               | 100%                                                                  |
| SVBP <sub>3-49</sub> -VASH1 C169A <sub>70-306</sub>       | EEEGEEY         | 4.4x10 <sup>9</sup>                 | 4.02x10 <sup>6</sup>              | 0.09%                                                                 |
| SVBP <sub>3-49</sub> -VASH1 C169S <sub>70-306</sub>       | EEEGEEY         | 7.0x10 <sup>9</sup>                 | ND                                | N/A                                                                   |
| SVBP <sub>3-49</sub> -VASH1 H204A <sub>70-306</sub>       | EEEGEEY         | 6.8x10 <sup>9</sup>                 | 2.8x10 <sup>5</sup>               | 0.004%                                                                |
| SVBP <sub>3-49</sub> -VASH1 Y134A <sub>70-306</sub>       | EEEGEEY         | 6.3x10 <sup>9</sup>                 | 8.0x10 <sup>6</sup>               | 0.1%                                                                  |
| SVBP <sub>3-49</sub> -VASH1 K146A <sub>70-306</sub>       | EEEGEEY         | 6.9x10 <sup>9</sup>                 | 1.3x10 <sup>6</sup>               | 0.02%                                                                 |
| SVBP <sub>3-49</sub> -VASH1 S221A <sub>70-306</sub>       | EEEGEEY         | 4.3x10 <sup>9</sup>                 | 7.8x10 <sup>6</sup>               | 0.2%                                                                  |
| SVBP <sub>3-49</sub> -VASH1 R222A <sub>70-306</sub>       | EEEGEEY         | 5.7x10 <sup>9</sup>                 | ND                                | N/A                                                                   |
| SVBP <sub>3-49</sub> -VASH1 K146A/R222A <sub>70-306</sub> | EEEGEEY         | 7.3x10 <sup>9</sup>                 | 6.6x10 <sup>5</sup>               | 0.009%                                                                |
| No protein                                                | GEEEGECY        | 1.7x10 <sup>9</sup>                 | ND                                | N/A                                                                   |
| SVBP <sub>3-49</sub> -VASH1 <sub>70-306</sub>             | GEEEGECY        | 4.3x10 <sup>9</sup>                 | 3.1x10 <sup>7</sup>               | 0.7%                                                                  |

\*ND: Not detectable; #N/A: Not applicable
