# Supplementary material
Source: PubMed Central journal article supplement (PMC6796878)
Supplement: 41422_2019_187_MOESM16_ESM.pdf [file 41422_2019_187_MOESM16_ESM.pdf]

**Table S2. Data collection and refinement statistics**

|                                                     | SeMet SVBP <sub>1-66</sub> -<br>VASH1 <sub>70-306</sub> | SVBP <sub>1-66</sub> -VASH1 <sub>70-306</sub>  | SVBP <sub>1-66</sub> -<br>VASH1 C169A <sub>70-306</sub> | SVBP <sub>3-49</sub> -VASH1 <sub>70-306</sub> -<br>GEEEGECY | SVBP <sub>1-52</sub> -<br>VASH1 <sub>57-306</sub> -epoY |
|-----------------------------------------------------|---------------------------------------------------------|------------------------------------------------|---------------------------------------------------------|-------------------------------------------------------------|---------------------------------------------------------|
| <b>PDB Accession code</b>                           | 6J9I                                                    | 6J9H                                           | 6J8N                                                    | 6J8F                                                        | 6J7B                                                    |
| <b>Data collection</b>                              |                                                         |                                                |                                                         |                                                             |                                                         |
| Radiation wavelength (Å)                            | 0.9793                                                  | 0.9792                                         | 0.9792                                                  | 0.9792                                                      | 0.9785                                                  |
| Space group                                         | I 2 2 2                                                 | P 2 <sub>1</sub> 2 <sub>1</sub> 2 <sub>1</sub> | P 2 <sub>1</sub> 2 <sub>1</sub> 2 <sub>1</sub>          | P 2 <sub>1</sub> 2 <sub>1</sub> 2                           | P 2 2 <sub>1</sub> 2 <sub>1</sub>                       |
| <b>Cell dimensions</b>                              |                                                         |                                                |                                                         |                                                             |                                                         |
| <i>a</i> , <i>b</i> , <i>c</i> (Å)                  | 68.23, 123.363, 129.52                                  | 71.52, 93.37, 126.04                           | 70.02, 90.08, 124.50                                    | 66.95, 108.38, 46.90                                        | 44.31, 70.92, 128.13                                    |
| $\alpha$ , $\beta$ , $\gamma$ (°)                   | 90, 90, 90                                              | 90, 90, 90                                     | 90, 90, 90                                              | 90, 90, 90                                                  | 90, 90, 90                                              |
| Resolution (Å)                                      | 50-3.50(3.56-3.50)                                      | 75.03-2.31(2.43-2.31)                          | 50-1.95(2.02-1.95)                                      | 54.19-2.28(2.41-2.28)                                       | 70.92-1.62(1.71-1.62)                                   |
| <i>R</i> <sub>merge</sub>                           | 0.288(0.719)                                            | 0.241(1.486)                                   | 0.166(1.006)                                            | 0.190(1.697)                                                | 0.130(1.326)                                            |
| <i>I</i> / $\sigma$ <i>I</i>                        | 18.9(6.0)                                               | 8.8(3.4)                                       | 18(3)                                                   | 10.9(2.2)                                                   | 12.8(2.4)                                               |
| CC1/2                                               | 0.995(0.958)                                            | 0.990(0.895)                                   | 1.000(0.853)                                            | 0.997(0.726)                                                | 0.998(0.686)                                            |
| Completeness (%)                                    | 100(100)                                                | 99.9(99.9)                                     | 100(99.9)                                               | 99.9(100.0)                                                 | 100(100)                                                |
| Redundancy                                          | 30.3(30.1)                                              | 12.6(13.3)                                     | 12.8(12.6)                                              | 12.5(12.9)                                                  | 12.0(12.3)                                              |
| <b>Refinement</b>                                   |                                                         |                                                |                                                         |                                                             |                                                         |
| Resolution (Å)                                      | 44.67-3.50                                              | 62.20-2.31                                     | 33.70-1.95                                              | 54.19-2.28                                                  | 44.31-1.62                                              |
| No. of unique reflections                           | 6832                                                    | 37795                                          | 57964                                                   | 16109                                                       | 52437                                                   |
| <i>R</i> <sub>work</sub> / <i>R</i> <sub>free</sub> | 0.232/0.258                                             | 0.248/0.271                                    | 0.185/0.210                                             | 0.199/0.241                                                 | 0.177/0.197                                             |
| <b>Number of atoms/B-factor (Å<sup>2</sup>)</b>     |                                                         |                                                |                                                         |                                                             |                                                         |
| VASH1(VASH1-EpoY)                                   | 1917/55.2                                               | 3850/54.8                                      | 3857/23.7                                               | 1917/51.9                                                   | 2053/27.2                                               |
| SVBP                                                | 200/78.6                                                | 459/63.4                                       | 400/26.6                                                | 183/58.3                                                    | 265/34.6                                                |
| Peptide                                             | N/A                                                     | N/A                                            | N/A                                                     | 41/59.0                                                     | N/A                                                     |
| solvent                                             | N/A                                                     | 127/49.4                                       | 649/33.7                                                | 47/45.3                                                     | 382/39.2                                                |
| RMSD bonds (Å)/angles (°)                           | 0.002/0.6                                               | 0.007/1.4                                      | 0.005/0.9                                               | 0.003/0.6                                                   | 0.007/0.9                                               |
| <b>Ramachandran Plot</b>                            |                                                         |                                                |                                                         |                                                             |                                                         |
| favored/allowed/outliers (%)                        | 97.2/2.8/0                                              | 96.1/3.9/0                                     | 97.6/2.4/0                                              | 96.9/3.1/0                                                  | 98.9/1.1/0                                              |

Values in parentheses are for highest-resolution shell.
