# Supplementary material
Source: PubMed Central journal article supplement (PMC6796878)
Supplement: 41422_2019_187_MOESM17_ESM.pdf [file 41422_2019_187_MOESM17_ESM.pdf]

**Table S3. The activity of SVBP-VASH1 heterodimer toward peptide substrates detected by mass spectrometry**

| <b>Proteins</b>                                         | <b>Peptides</b> | <b>MS Intensity<br/>(Substrate)</b> | <b>MS Intensity<br/>(Product)</b> | <b>Percentage of detyrosination<br/>(Product/(Substrate+product))</b> |
|---------------------------------------------------------|-----------------|-------------------------------------|-----------------------------------|-----------------------------------------------------------------------|
| SVBP <sub>1-66</sub> -VASH1 <sub>70-306</sub>           | EEEGEEY         | 1.2x10 <sup>6</sup>                 | 1.2x10 <sup>6</sup>               | 50%                                                                   |
| SVBP Q35A/R36A <sub>1-66</sub> -VASH1 <sub>70-306</sub> | EEEGEEY         | 2.4x10 <sup>6</sup>                 | 1.0x10 <sup>6</sup>               | 29%                                                                   |
| SVBP I39A/Y40A <sub>1-66</sub> -VASH1 <sub>70-306</sub> | EEEGEEY         | 4.5x10 <sup>6</sup>                 | 1.1x10 <sup>6</sup>               | 20%                                                                   |
| SVBP L42A/N43A <sub>1-66</sub> -VASH1 <sub>70-306</sub> | EEEGEEY         | 2.0x10 <sup>8</sup>                 | 3.3x10 <sup>6</sup>               | 1.6%                                                                  |
| SVBP V45A/M46A <sub>1-66</sub> -VASH1 <sub>70-306</sub> | EEEGEEY         | 2.7x10 <sup>6</sup>                 | 1.0x10 <sup>6</sup>               | 27%                                                                   |
