# Supplementary material
Source: PubMed Central journal article supplement (PMC6796878)
Supplement: 41422_2019_187_MOESM18_ESM.pdf [file 41422_2019_187_MOESM18_ESM.pdf]

**Table S4. Spindle length quantification of cells treated with control or VASH1/2 siRNAs and expressing VASH1-GFP mutants.**

|                                                                                 | siCTRL         | siV12         | siV12+V1-GFP   | siV12+V1_H204A-GFP | siV12+V1_C169A-GFP | siV12+V1_K146A/R222A-GFP |
|---------------------------------------------------------------------------------|----------------|---------------|----------------|--------------------|--------------------|--------------------------|
| <b>Spindle length (<math>\mu\text{m}</math>)<br/>(mean <math>\pm</math> SD)</b> | 12.2 $\pm$ 1.9 | 9.3 $\pm$ 1.8 | 11.2 $\pm$ 1.7 | 9.7 $\pm$ 1.5      | 9.6 $\pm$ 1.3      | 9.9 $\pm$ 1.6            |
